# Supplementary material for: Atg9A trafficking through the recycling endosomes is required for autophagosome formation
Source: Oxford University Press journal article supplement (doi:10.1242/jcs.196196), 2016-09-02
Supplement: jcs196196supp.pdf [file jcs196196supp.pdf]

**A**

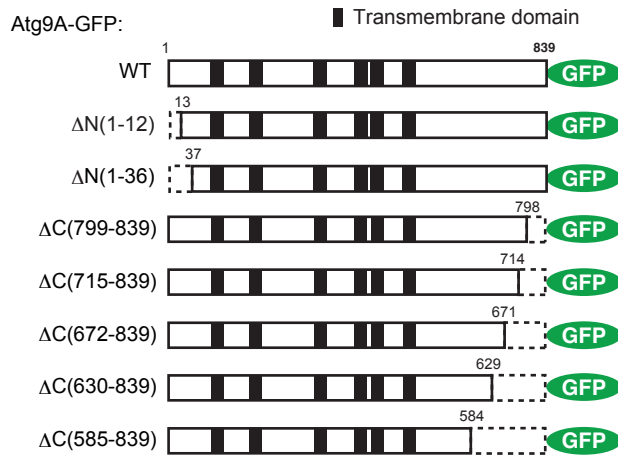

**B**

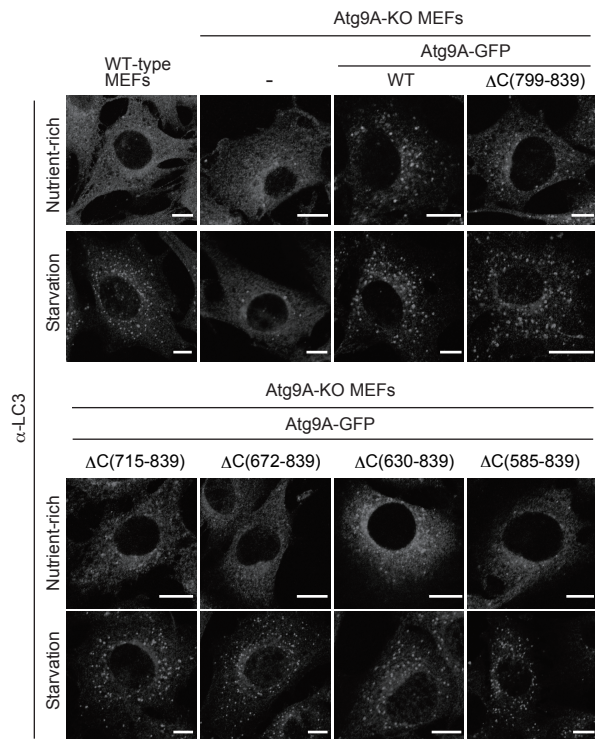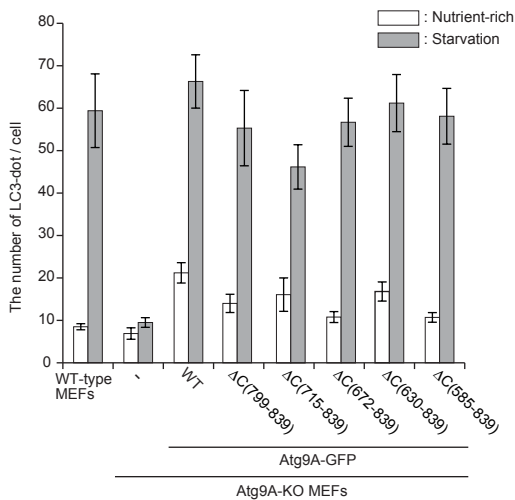

**C**

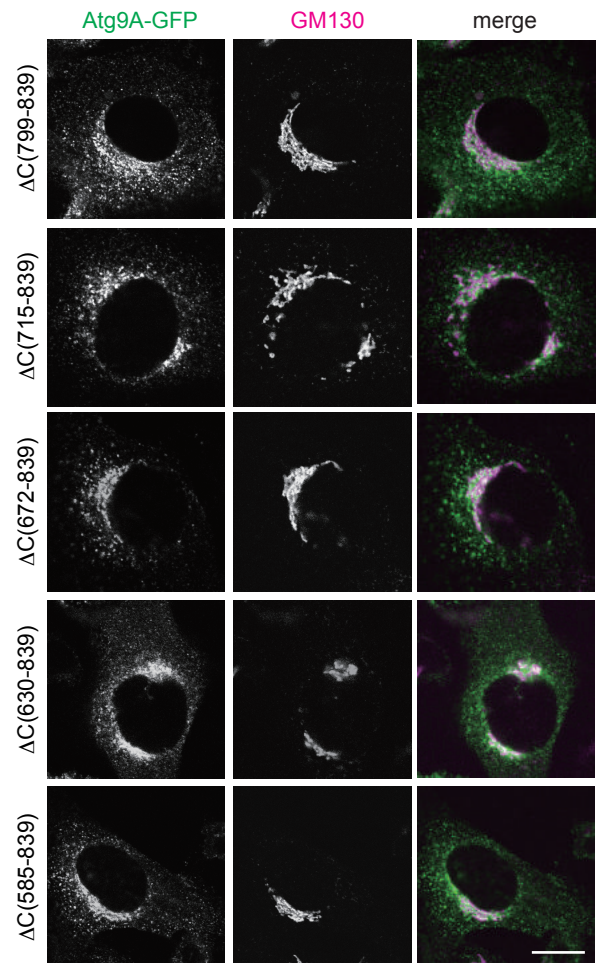

Figure S1. The C-terminal deletions of Atg9A dose not affect autophagosome formation and its localization.

(A) Schematic diagram of wild-type Atg9A and its deletion mutants tagged with GFP. The transmembrane domain is indicated as black boxes. (B) Wild-type or Atg9A-KO MEFs stably expressing the indicated constructs were cultured in growth medium (Nutrient-rich) or EBSS (Starvation) for 1 h, then analyzed by immunocytochemistry for LC3. The number of LC3 puncta in each cell was counted for more than 30 cells. The average  $\pm$  SD is shown for three independent experiments. Bar, 20  $\mu$ m. (C) Atg9A-KO MEFs stably expressing the indicated constructs were analyzed by immunocytochemistry for anti-GM130. Bar, 20  $\mu$ m.

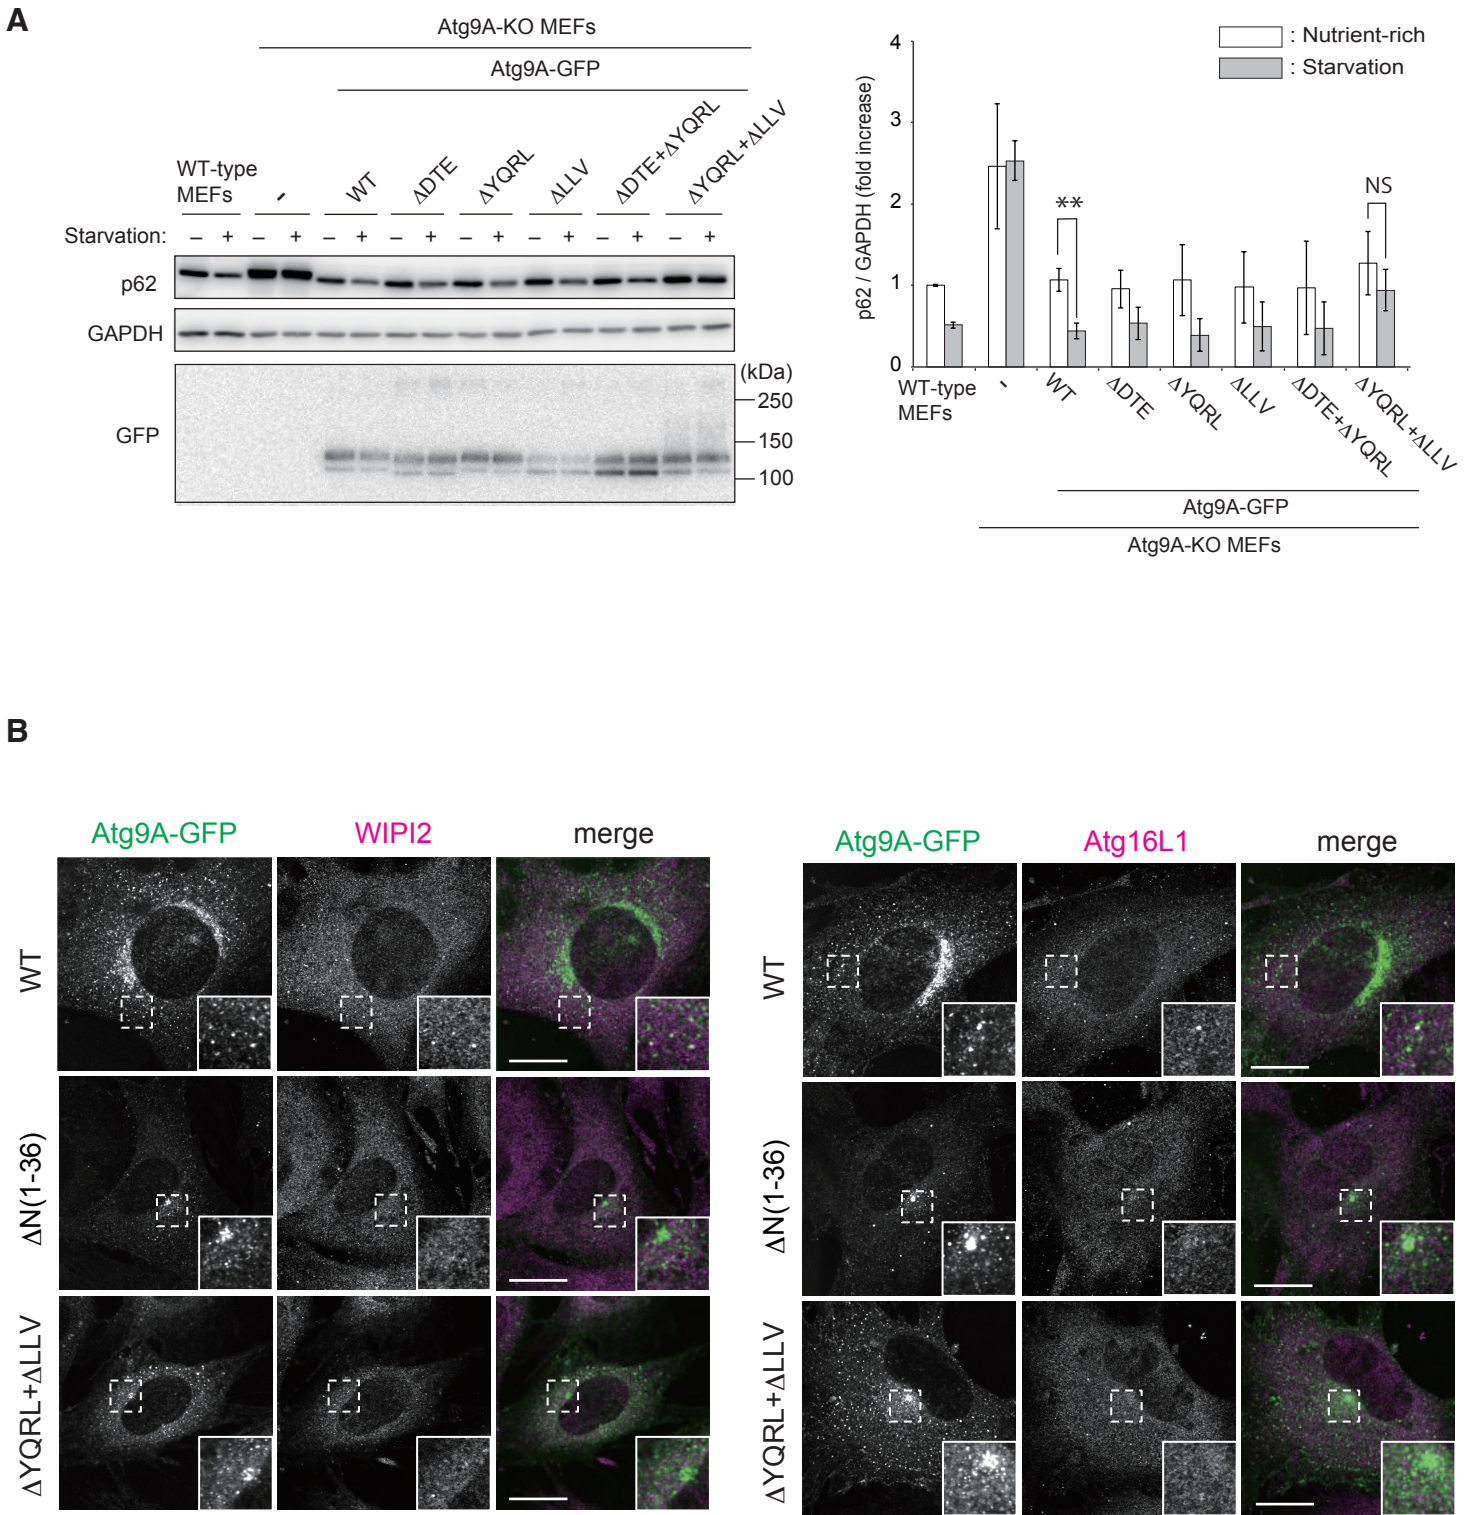

Figure S2. The effects of alanine substitutions in sorting motifs on autophagy.

(A) Wild-type MEFs or Atg9A-KO MEFs stably expressing the indicated constructs were cultured in growth medium (Nutrient-rich) or EBSS (Starvation) for 2 h, and subjected to western blotting using indicated antibodies. The graph indicates the p62 signal relative to GAPDH. The average  $\pm$ SD is shown for three independent experiments. Statistical analysis was performed by two-tailed paired Student's t-test: \*\*,  $P < 0.01$ ; NS, not significant. (B) Atg9A-KO MEFs stably expressing the indicated constructs were cultured in EBSS (Starvation) for 1 h, fixed, and then analyzed by immunocytochemistry for anti-WIPI2 or anti-Atg16L1. Bar, 20  $\mu$ m.



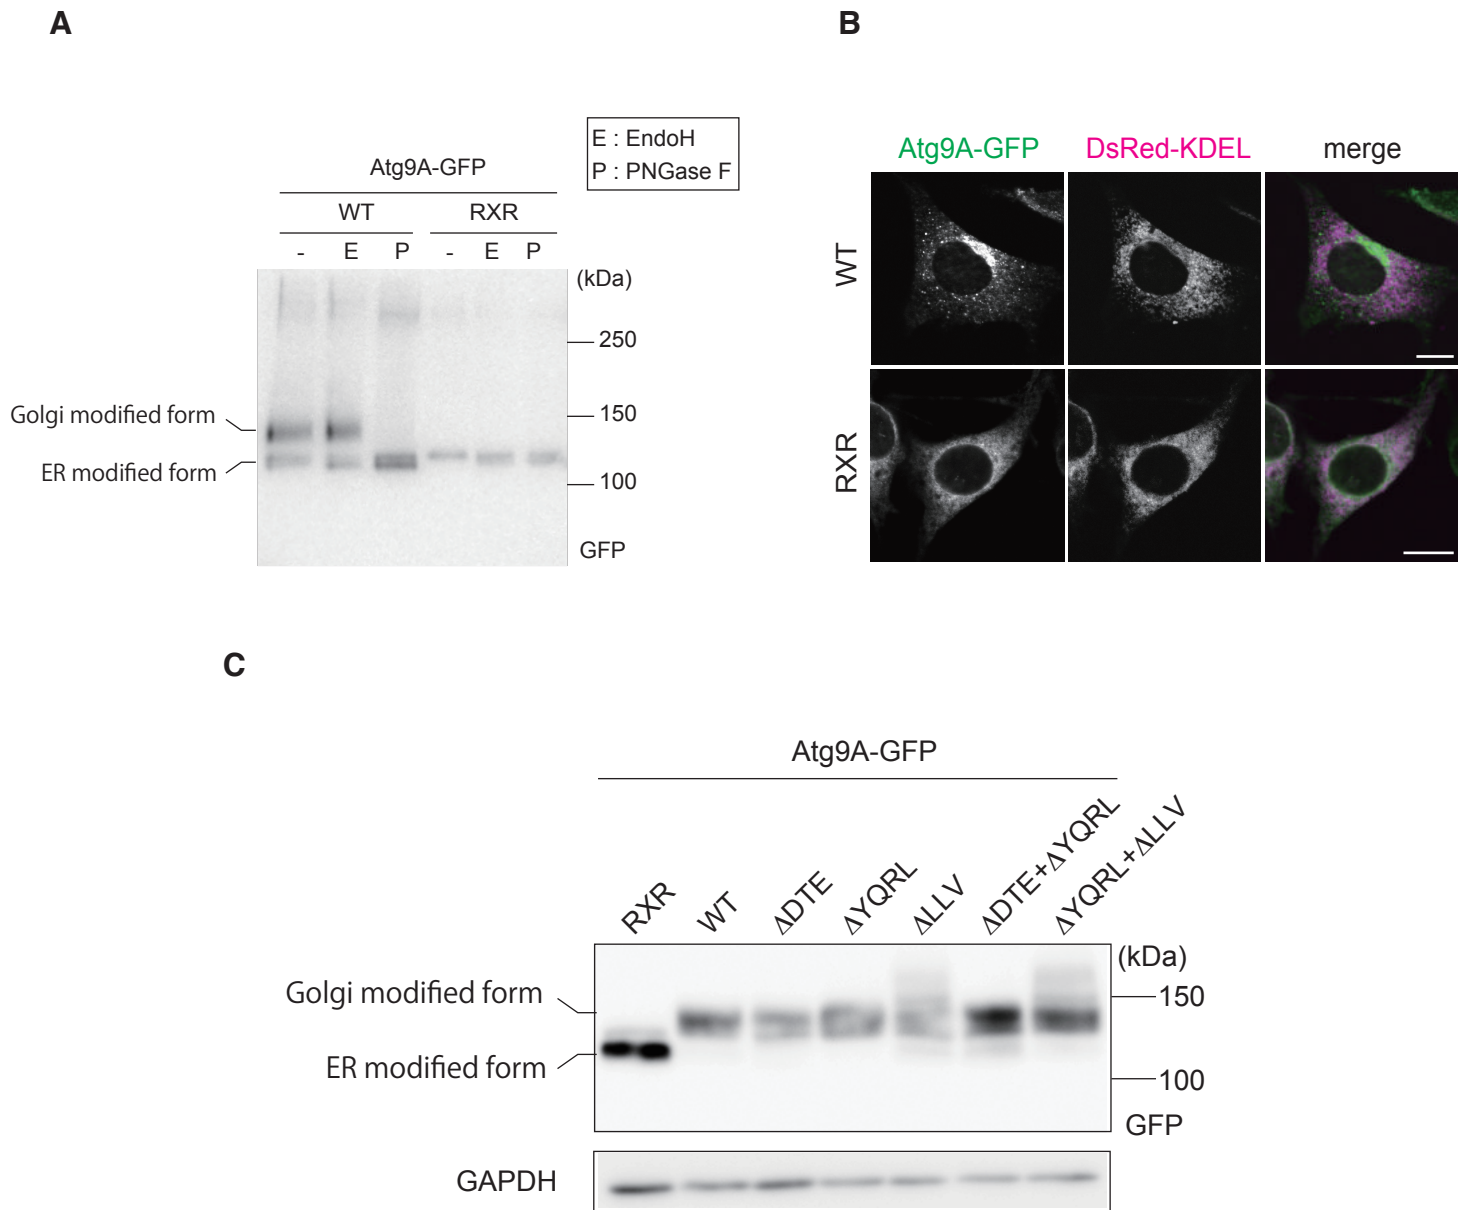

Figure S3. The effects of alanine substitutions in sorting motifs on N-glycan modification of Atg9A.

(A) Atg9A-KO MEFs stably expressing the indicated constructs were lysed and subjected to treatment with EndoH or PNGase F, and analyzed by western blotting with anti-GFP. Atg9A-WT-EGFP was detected as two major bands by western blotting. When the sample was treated with endoglycosidase H (Endo H) which removes only high mannose and some hybrid types of N-glycan from glycoproteins (Maley et al., 1989), the faster migrating band was shifted slightly, whereas the slower migrating band was resistant to EndoH. Treatment with N-Glycosidase F (PNGase F), which removes all N-glycan from glycoproteins (Maley et al., 1989), resulted in mobility shift of both bands to a single band. (B) Atg9A-KO MEFs stably expressing the indicated constructs were transiently transfected with pDsRed-KDEL expression plasmid, fixed, and examined by fluorescence microscopy. When RXR motif, the ER retrieval signal, was added to its C-terminus of Atg9A, the mutant showed good colocalization with an ER marker (DsRed-KDEL) (C) Atg9A-KO MEFs stably expressing the indicated constructs were lysed and analyzed by western blotting with anti-GFP.

Maley, F., Trimble, R. B., Tarentino, A. L. and Plummer, T. H. Jr. (1989). Characterization of glycoproteins and their associated oligosaccharides through the use of endoglycosidases. *Anal. Biochem.* **180**, 195-204.

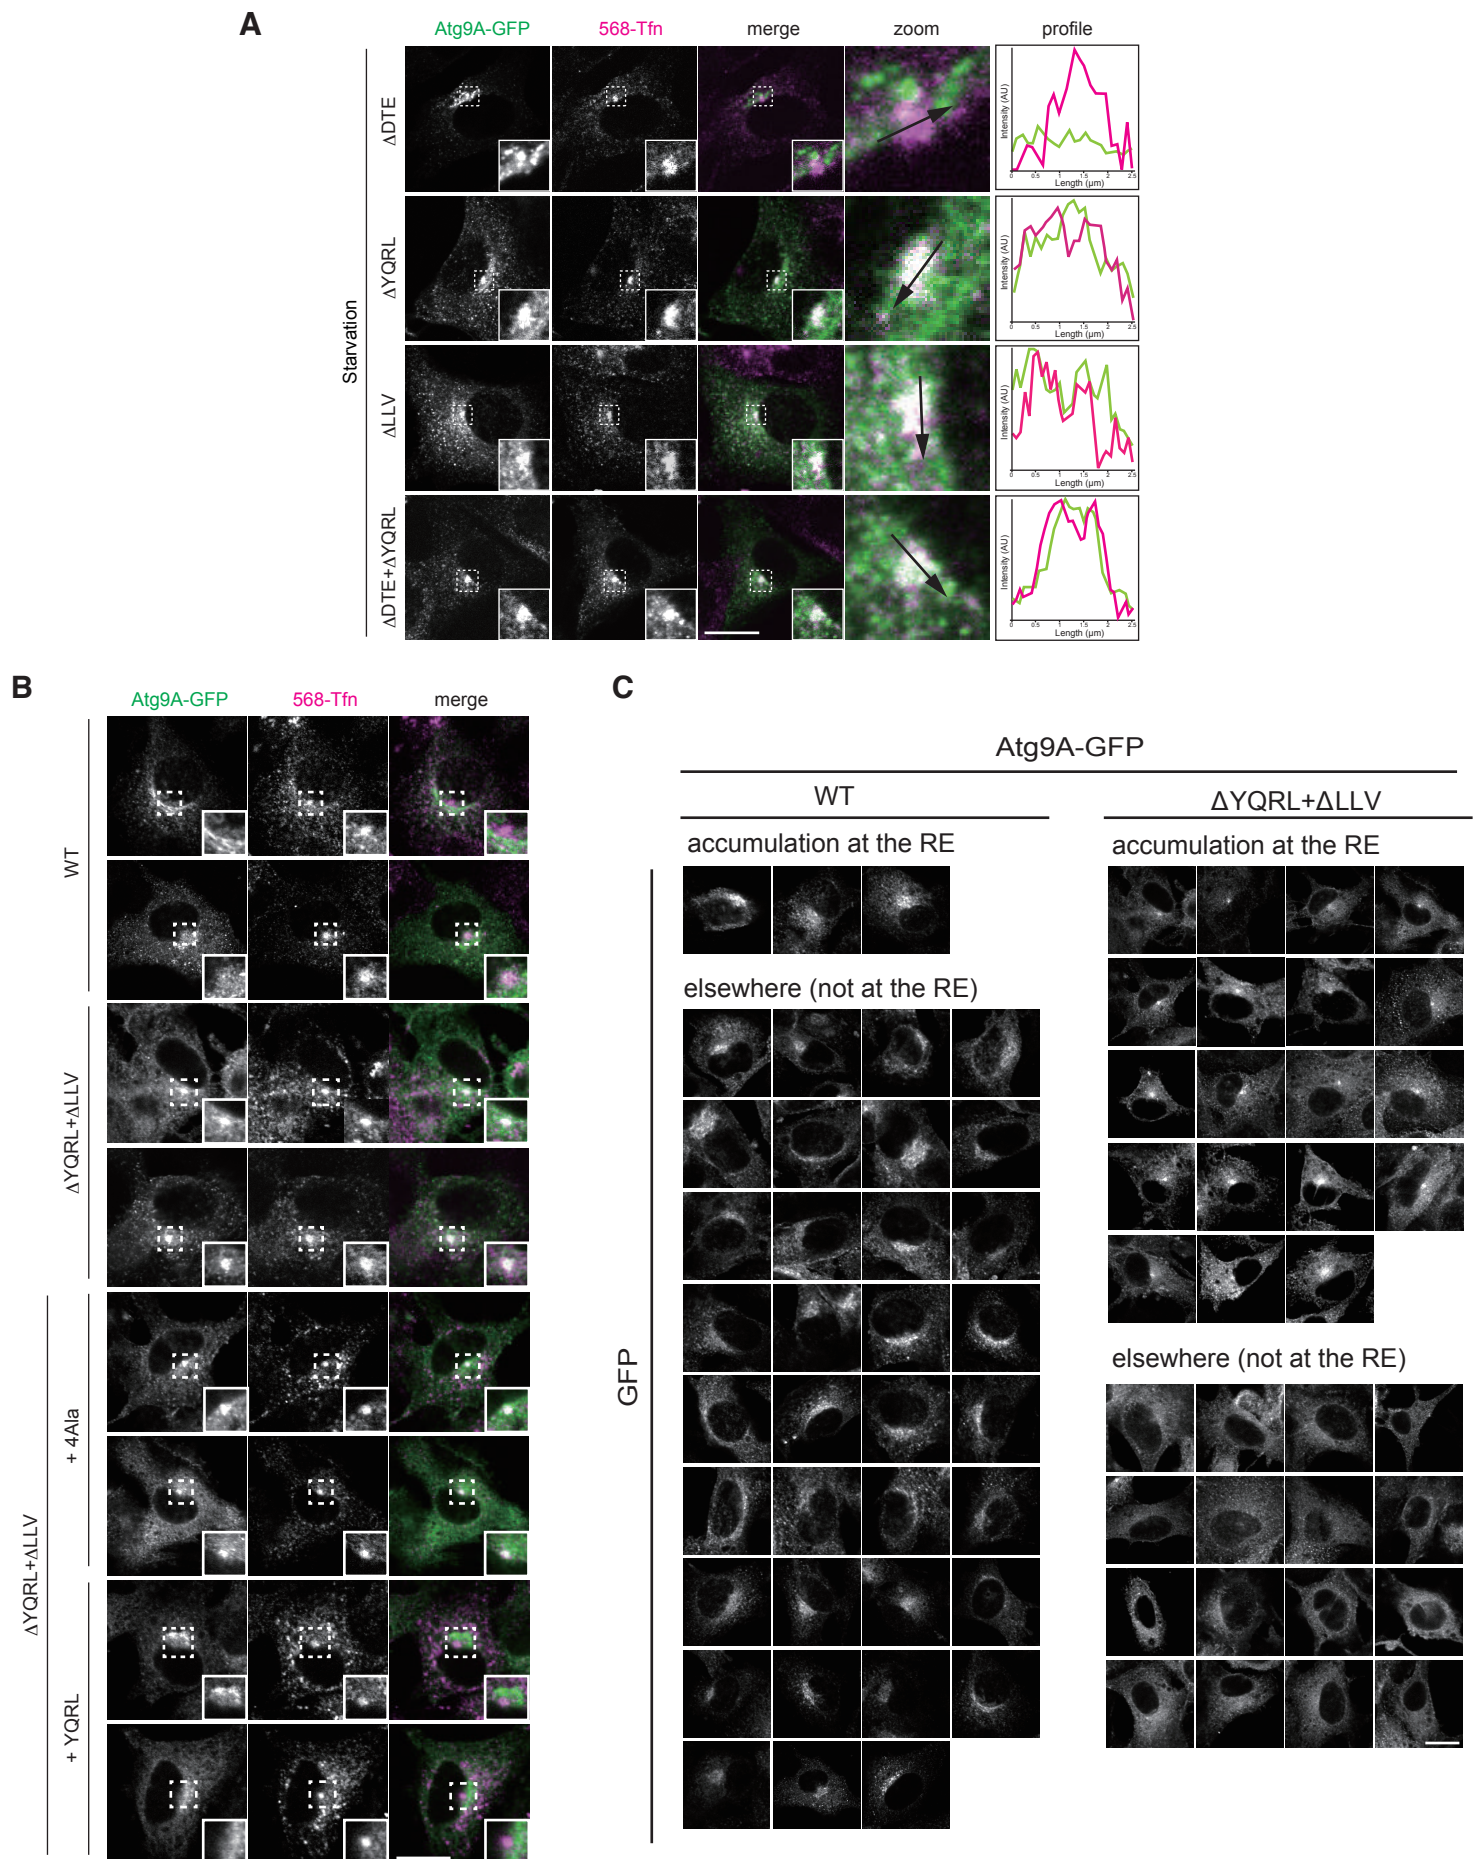

Figure S4. The effects of alanine substitutions in sorting motifs on Atg9A localization.

(A-B) Atg9A-KO MEFs stably expressing the indicated constructs were cultured in EBSS (Starvation) with 10  $\mu$ g/ml 568-Tfn for 1 h, and then observed by fluorescence microscopy. Bar, 20  $\mu$ m. (C) Atg9A-KO MEFs stably expressing indicated constructs were cultured in EBSS (Starvation) with 10  $\mu$ g/ml 568-Tfn for 1 h, fixed, and then observed by fluorescence microscopy. Bar, 20  $\mu$ m. Examples of Atg9A accumulated at the recycling endosomes (RE) and remained elsewhere (not at the RE) were shown for both WT and  $\Delta$ YQRL+ $\Delta$ LLV mutant cells. Atg9A WT showed the accumulation at the RE phenotype in only 7.9 % cells (3 of 38 total cell counted), while  $\Delta$ YQRL+ $\Delta$ LLV mutant showed in 54.3% cells (19 of 35 total cell counted).
